# Supplementary material
Source: Springer Nature journal article supplement (https://www.springermedizin.de/resource/supplementary/12968_2008_41_MOESM4_ESM.pdf/9577856)

Before

After

Diastole

Systole

Delayed-Enhancement

Diastole

Systole

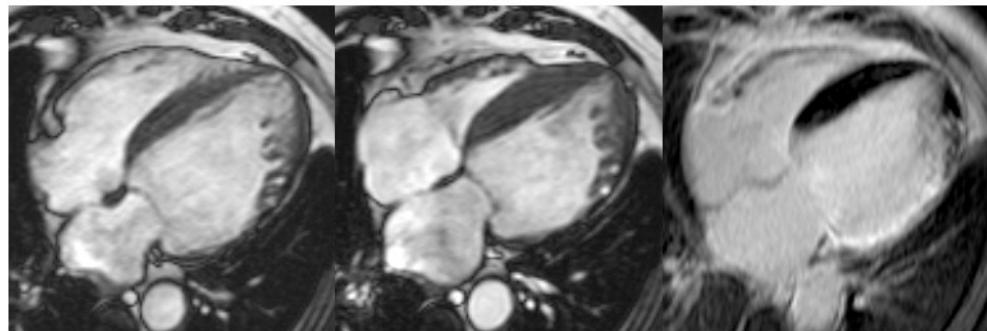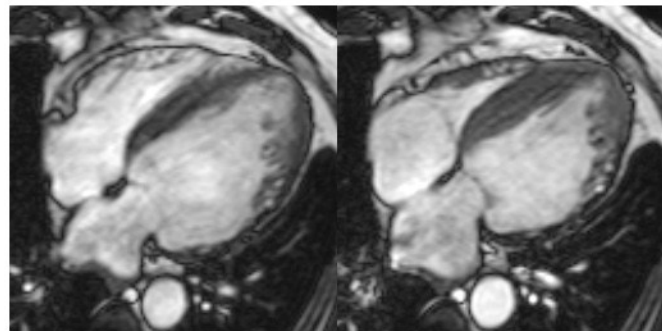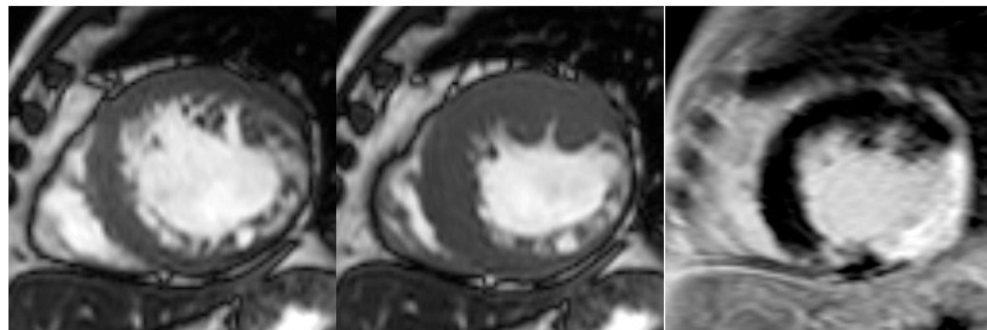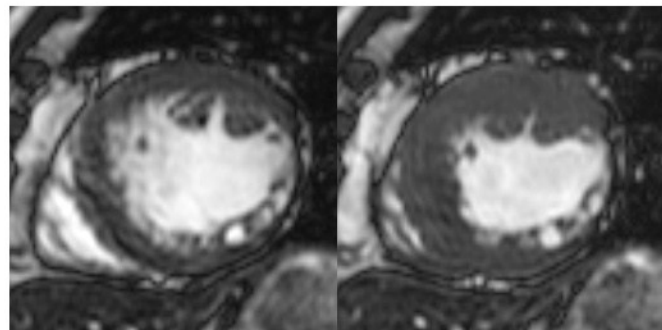

Supplement: MOESM4 [file 9577856]
